# Supplementary material for: Preterm delivery and long term mortality in women: national cohort and co-sibling study
Source: PubMed Central journal article supplement — BMJ. 2020 Aug 19;370:m2533. doi: 10.1136/bmj.m2533 (PMC7436341; doi:10.1136/bmj.m2533), 2020-08-19
Supplement: cruc054946.ww.pdf [file cruc054946.ww.pdf]

## SUPPLEMENTAL MATERIAL

### **Contents**

|                                                                                                                                                                                                                             |        |
|-----------------------------------------------------------------------------------------------------------------------------------------------------------------------------------------------------------------------------|--------|
| <b>Supplemental Table 1.</b> Interactions between women's pregnancy duration and preeclampsia in relation to mortality with up to 44 years of follow-up.                                                                    | Page 2 |
| <b>Supplemental Table 2.</b> Interactions between women's pregnancy duration and fetal growth in relation to mortality with up to 44 years of follow-up.                                                                    | Page 3 |
| <b>Supplemental Table 3.</b> Associations between women's pregnancy duration or number of preterm deliveries and mortality with up to 44 years of follow-up, stratified by maternal age or calendar year at first delivery. | Page 4 |
| <b>Supplemental Figure 1.</b> Kaplan-Meier survival curves by pregnancy duration.                                                                                                                                           | Page 5 |

**Supplemental Table 1. Interactions between women's pregnancy duration and preeclampsia in relation to mortality with up to 44 years of follow-up.**

|                                                                | Pregnancy duration            |                                      |                               |                                       |                               |                                       | HRs for early term vs. full-term within preeclampsia strata | HRs for preterm vs. full-term within preeclampsia strata |
|----------------------------------------------------------------|-------------------------------|--------------------------------------|-------------------------------|---------------------------------------|-------------------------------|---------------------------------------|-------------------------------------------------------------|----------------------------------------------------------|
|                                                                | Full-term (39-41 wks)         |                                      | Early term (37-38 wks)        |                                       | Preterm (<37 wks)             |                                       |                                                             |                                                          |
|                                                                | Rate <sup>a</sup><br>(Deaths) | Adjusted HR<br>(95% CI) <sup>b</sup> | Rate <sup>a</sup><br>(Deaths) | Adjusted HR<br>(95% CI) <sup>b</sup>  | Rate <sup>a</sup><br>(Deaths) | Adjusted HR<br>(95% CI) <sup>b</sup>  |                                                             |                                                          |
| <b>Preeclampsia</b>                                            |                               |                                      |                               |                                       |                               |                                       |                                                             |                                                          |
| No                                                             | 140.0<br>(24,776)             | Reference                            | 174.0<br>(8,067)              | 1.17 (1.14, 1.20);<br><i>P</i> <0.001 | 248.9<br>(3,402)              | 1.51 (1.45, 1.56);<br><i>P</i> <0.001 | 1.17 (1.14, 1.20);<br><i>P</i> <0.001                       | 1.51 (1.45, 1.56);<br><i>P</i> <0.001                    |
| Yes                                                            | 137.3<br>(23,640)             | 0.98 (0.97, 1.00);<br><i>P</i> =0.05 | 160.3<br>(6,917)              | 1.12 (1.09, 1.15);<br><i>P</i> <0.001 | 255.3<br>(2,885)              | 1.56 (1.50, 1.62);<br><i>P</i> <0.001 | 1.14 (1.11, 1.17);<br><i>P</i> <0.001                       | 1.59 (1.53, 1.65);<br><i>P</i> <0.001                    |
| HRs (95% CI) for preeclampsia within pregnancy duration strata |                               | 0.98 (0.97, 1.00);<br><i>P</i> =0.05 |                               | 0.95 (0.92, 0.98);<br><i>P</i> =0.002 |                               | 1.04 (0.99, 1.09);<br><i>P</i> =0.16  |                                                             |                                                          |
| Interaction on additive scale: RERI (95% CI)                   |                               |                                      |                               | -0.04 (-0.08, 0.001); <i>P</i> =0.06  |                               | 0.07 (-0.005, 0.15); <i>P</i> =0.07   |                                                             |                                                          |
| Interaction on multiplicative scale: HR ratio (95% CI)         |                               |                                      |                               | 0.97 (0.93, 1.00); <i>P</i> =0.08     |                               | 1.06 (1.00, 1.11); <i>P</i> =0.05     |                                                             |                                                          |

<sup>a</sup>All-cause mortality rate per 100,000 person-years.

<sup>b</sup>Adjusted for maternal age, year of delivery, parity, education, employment, income, region of origin, BMI, smoking, other hypertensive disorders, diabetes, asthma, rheumatoid arthritis, and depression.

HR = hazard ratio, RERI = relative excess risk due to interaction

**Supplemental Table 2. Interactions between women's pregnancy duration and fetal growth in relation to mortality with up to 44 years of follow-up.**

|                                                               | Pregnancy duration            |                                       |                                    |                                       |                                     |                                       | HRs (95% CI) for early term vs. full-term within fetal growth strata | HRs (95% CI) for preterm vs. full-term within fetal growth strata |
|---------------------------------------------------------------|-------------------------------|---------------------------------------|------------------------------------|---------------------------------------|-------------------------------------|---------------------------------------|----------------------------------------------------------------------|-------------------------------------------------------------------|
|                                                               | Full-term (39-41 wks)         |                                       | Early term (37-38 wks)             |                                       | Preterm (<37 wks)                   |                                       |                                                                      |                                                                   |
|                                                               | Rate <sup>a</sup><br>(Deaths) | Adjusted HR<br>(95% CI) <sup>b</sup>  | Rate <sup>a</sup><br>(Deaths)      | Adjusted HR<br>(95% CI) <sup>b</sup>  | Rate <sup>a</sup><br>(Deaths)       | Adjusted HR<br>(95% CI) <sup>b</sup>  |                                                                      |                                                                   |
| <b>Fetal growth</b>                                           |                               |                                       |                                    |                                       |                                     |                                       |                                                                      |                                                                   |
| AGA                                                           | 137.0<br>(33,912)             | Reference                             | 145.2<br>(13,292)                  | 1.12 (1.10, 1.15);<br><i>P</i> <0.001 | 194.8<br>(6,531)                    | 1.42 (1.38, 1.46);<br><i>P</i> <0.001 | 1.12 (1.10, 1.15);<br><i>P</i> <0.001                                | 1.42 (1.38, 1.46);<br><i>P</i> <0.001                             |
| SGA                                                           | 230.2<br>(5,304)              | 1.40 (1.36, 1.44);<br><i>P</i> <0.001 | 252.2<br>(1,620)                   | 1.58 (1.50, 1.66);<br><i>P</i> <0.001 | 303.8<br>(1,015)                    | 1.81 (1.70, 1.93);<br><i>P</i> <0.001 | 1.12 (1.06, 1.19);<br><i>P</i> <0.001                                | 1.29 (1.21, 1.38);<br><i>P</i> <0.001                             |
| HRs (95% CI) for SGA vs. AGA within pregnancy duration strata |                               | 1.40 (1.36, 1.44);<br><i>P</i> <0.001 |                                    | 1.40 (1.33, 1.48);<br><i>P</i> <0.001 |                                     | 1.28 (1.19, 1.36);<br><i>P</i> <0.001 |                                                                      |                                                                   |
| Interaction on additive scale: RERI (95% CI)                  |                               |                                       | 0.05 (-0.04, 0.14); <i>P</i> =0.25 |                                       | -0.01 (-0.13, 0.11); <i>P</i> =0.88 |                                       |                                                                      |                                                                   |
| Interaction on multiplicative scale: HR ratio (95% CI)        |                               |                                       | 1.00 (0.94, 1.06); <i>P</i> =0.95  |                                       | 0.91 (0.84, 0.98); <i>P</i> =0.008  |                                       |                                                                      |                                                                   |

<sup>a</sup>All-cause mortality rate per 100,000 person-years.

<sup>b</sup>Adjusted for maternal age, year of delivery, parity, education, employment, income, region of origin, BMI, smoking, preeclampsia, other hypertensive disorders, diabetes, asthma, rheumatoid arthritis, and depression.

AGA = appropriate for gestational age, HR = hazard ratio, RERI = relative excess risk due to interaction, SGA = small for gestational age

**Supplemental Table 3. Associations between women's pregnancy duration or number of preterm deliveries and mortality with up to 44 years of follow-up, stratified by maternal age or calendar year at first delivery.**

|                                       | HR (95% CI) <sup>a</sup> | HR (95% CI) <sup>a</sup> | P for interaction |
|---------------------------------------|--------------------------|--------------------------|-------------------|
| <b>Maternal age at first delivery</b> |                          |                          |                   |
| <b>Pregnancy duration</b>             | <b>&lt;35 years</b>      | <b>≥35 years</b>         |                   |
| Preterm (<37 wks)                     | 1.38 (1.34, 1.42)        | 1.44 (1.36, 1.53)        | 0.93              |
| Extremely preterm (22-27 wks)         | 1.65 (1.42, 1.92)        | 1.58 (1.22, 2.03)        |                   |
| Very preterm (28-33 wks)              | 1.56 (1.48, 1.66)        | 1.54 (1.39, 1.72)        |                   |
| Late preterm (34-36 wks)              | 1.31 (1.26, 1.36)        | 1.40 (1.31, 1.50)        |                   |
| Early term (37-38 wks)                | 1.12 (1.09, 1.14)        | 1.14 (1.09, 1.19)        |                   |
| Full-term (39-41 wks)                 | Reference                | Reference                |                   |
| Post-term (≥42 wks)                   | 1.03 (1.00, 1.05)        | 1.04 (0.98, 1.11)        |                   |
| Per additional week (trend)           | 0.96 (0.96, 0.97)        | 0.96 (0.95, 0.96)        | 0.23              |
| <b>Number of preterm deliveries</b>   |                          |                          |                   |
| 0                                     | Reference                | Reference                | 0.67              |
| 1                                     | 1.30 (1.27, 1.34)        | 1.36 (1.28, 1.43)        |                   |
| ≥2                                    | 1.32 (1.25, 1.40)        | 1.48 (1.18, 1.84)        |                   |
| <b>Year of first delivery</b>         |                          |                          |                   |
| <b>Pregnancy duration</b>             | <b>&lt;1980</b>          | <b>≥1980</b>             |                   |
| Preterm (<37 wks)                     | 1.39 (1.34, 1.43)        | 1.35 (1.29, 1.41)        | 0.42              |
| Extremely preterm (22-27 wks)         | 1.55 (1.31, 1.84)        | 1.59 (1.31, 1.93)        |                   |
| Very preterm (28-33 wks)              | 1.55 (1.45, 1.65)        | 1.50 (1.38, 1.63)        |                   |
| Late preterm (34-36 wks)              | 1.33 (1.28, 1.38)        | 1.29 (1.23, 1.36)        |                   |
| Early term (37-38 wks)                | 1.12 (1.09, 1.15)        | 1.11 (1.08, 1.15)        |                   |
| Full-term (39-41 wks)                 | Reference                | Reference                |                   |
| Post-term (≥42 wks)                   | 1.04 (1.01, 1.06)        | 1.01 (0.97, 1.06)        |                   |
| Per additional week (trend)           | 0.97 (0.96, 0.97)        | 0.96 (0.96, 0.97)        | 0.72              |
| <b>Number of preterm deliveries</b>   |                          |                          |                   |
| 0                                     | Reference                | Reference                | 0.16              |
| 1                                     | 1.30 (1.26, 1.34)        | 1.30 (1.25, 1.36)        |                   |
| ≥2                                    | 1.35 (1.25, 1.45)        | 1.29 (1.18, 1.40)        |                   |

<sup>a</sup>Adjusted for maternal age, year of delivery, parity, education, employment, income, region of origin, BMI, smoking, preeclampsia, other hypertensive disorders, diabetes, asthma, rheumatoid arthritis, and depression.

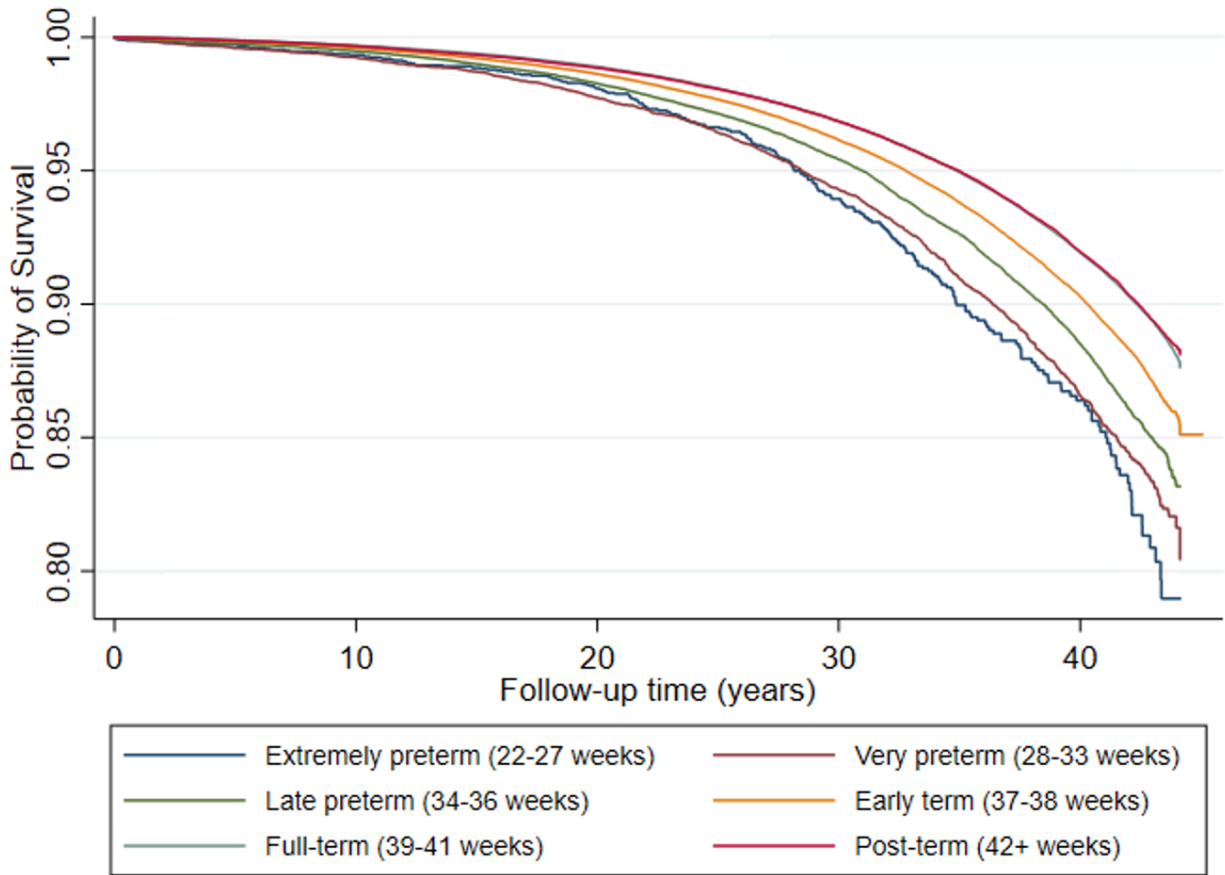

**Supplemental Figure 1. Kaplan-Meier survival curves by pregnancy duration.**
